# Supplementary material for: A model of yeast glycolysis based on a consistent kinetic characterisation of all its enzymes
Source: PubMed Central journal article supplement (PMC3764422; doi:10.1016/j.febslet.2013.06.043), 2013-09-02
Supplement: mmc1.pdf [file mmc1.pdf]

## Introduction

This document constitutes supplementary material for the article by Smallbone *et al.* (2013) “A model of yeast glycolysis based on a consistent kinetic characterization of all its enzymes”. It contains the full final mathematical model (model 18 in the manuscript). Note, however, that this is a transcription of the electronic version of the model to  $\LaTeX$  which, although checked, may still contain errors. The definitive version of all models in this article are the electronic versions deposited in the BioModels database, with accession numbers MODEL1303260000–MODEL1303260018 (accessible from e.g. <http://identifiers.org/biomodels.db/MODEL1303260018>).

## Rate laws

$$v_{\text{acetate branch}} = k_{\text{(acetate branch)}} \cdot [\text{acetaldehyde}] \cdot [\text{NAD}]$$

$$v_{\text{ADH1}} = \frac{[\text{ADH1}] \cdot k_{\text{cat}}(\text{ADH1}) \cdot \left( \frac{[\text{acetaldehyde}] \cdot [\text{NADH}]}{K_{\text{acald}}(\text{ADH1}) \cdot K_{\text{inadh}}(\text{ADH1})} - \frac{[\text{ethanol}] \cdot [\text{NAD}]}{K_{\text{acald}}(\text{ADH1}) \cdot K_{\text{inadh}}(\text{ADH1}) \cdot K_{\text{eq\_ADH}}} \right)}{1 + \frac{[\text{NADH}]}{K_{\text{inadh}}(\text{ADH1})} + \frac{[\text{acetaldehyde}] \cdot K_{\text{inadh}}(\text{ADH1})}{K_{\text{inadh}}(\text{ADH1}) \cdot K_{\text{acald}}(\text{ADH1})} + \frac{[\text{ethanol}] \cdot K_{\text{inadh}}(\text{ADH1})}{K_{\text{inadh}}(\text{ADH1}) \cdot K_{\text{acald}}(\text{ADH1})} + K_{\text{inad}}(\text{ADH1}) \cdot K_{\text{etoh}}(\text{ADH1}) + K_{\text{inad}}(\text{ADH1}) \cdot K_{\text{mathrm}}(\text{ADH1}) + \frac{[\text{acetaldehyde}] \cdot [\text{NADH}]}{K_{\text{inadh}}(\text{ADH1}) \cdot K_{\text{acald}}(\text{ADH1})} + \frac{[\text{ethanol}] \cdot [\text{NAD}]}{K_{\text{inadh}}(\text{ADH1}) \cdot K_{\text{acald}}(\text{ADH1})} + \frac{[\text{acetaldehyde}] \cdot [\text{NADH}] \cdot K_{\text{inadh}}(\text{ADH1})}{K_{\text{inadh}}(\text{ADH1}) \cdot K_{\text{acald}}(\text{ADH1}) \cdot K_{\text{etoh}}(\text{ADH1})} + \frac{[\text{ethanol}] \cdot [\text{NAD}]}{K_{\text{inadh}}(\text{ADH1}) \cdot K_{\text{acald}}(\text{ADH1})} + \frac{[\text{acetaldehyde}] \cdot [\text{NADH}] \cdot [\text{ethanol}]}{K_{\text{inadh}}(\text{ADH1}) \cdot K_{\text{acald}}(\text{ADH1}) \cdot K_{\text{etoh}}(\text{ADH1})} + \frac{[\text{acetaldehyde}] \cdot [\text{ethanol}] \cdot [\text{NAD}]}{K_{\text{inadh}}(\text{ADH1}) \cdot K_{\text{acald}}(\text{ADH1}) \cdot K_{\text{etoh}}(\text{ADH1})}$$

$$v_{\text{ADH5}} = \frac{[\text{ADH5}] \cdot k_{\text{cat}}(\text{ADH5}) \cdot \left( \frac{[\text{acetaldehyde}] \cdot [\text{NADH}]}{K_{\text{acald}}(\text{ADH5}) \cdot K_{\text{inadh}}(\text{ADH5})} - \frac{[\text{ethanol}] \cdot [\text{NAD}]}{K_{\text{acald}}(\text{ADH5}) \cdot K_{\text{inadh}}(\text{ADH5}) \cdot K_{\text{eq\_ADH}}} \right)}{1 + \frac{[\text{NADH}]}{K_{\text{inadh}}(\text{ADH5})} + \frac{[\text{acetaldehyde}] \cdot K_{\text{inadh}}(\text{ADH5})}{K_{\text{inadh}}(\text{ADH5}) \cdot K_{\text{acald}}(\text{ADH5})} + \frac{[\text{ethanol}] \cdot K_{\text{inadh}}(\text{ADH5})}{K_{\text{inadh}}(\text{ADH5}) \cdot K_{\text{acald}}(\text{ADH5})} + K_{\text{inad}}(\text{ADH5}) \cdot K_{\text{etoh}}(\text{ADH5}) + K_{\text{inad}}(\text{ADH5}) \cdot K_{\text{mathrm}}(\text{ADH5}) + \frac{[\text{acetaldehyde}] \cdot [\text{NADH}]}{K_{\text{inadh}}(\text{ADH5}) \cdot K_{\text{acald}}(\text{ADH5})} + \frac{[\text{ethanol}] \cdot [\text{NAD}]}{K_{\text{inadh}}(\text{ADH5}) \cdot K_{\text{acald}}(\text{ADH5})} + \frac{[\text{acetaldehyde}] \cdot [\text{NADH}] \cdot K_{\text{inadh}}(\text{ADH5})}{K_{\text{inadh}}(\text{ADH5}) \cdot K_{\text{acald}}(\text{ADH5}) \cdot K_{\text{etoh}}(\text{ADH5})} + \frac{[\text{ethanol}] \cdot [\text{NAD}]}{K_{\text{inadh}}(\text{ADH5}) \cdot K_{\text{acald}}(\text{ADH5})} + \frac{[\text{acetaldehyde}] \cdot [\text{NADH}] \cdot [\text{ethanol}]}{K_{\text{inadh}}(\text{ADH5}) \cdot K_{\text{acald}}(\text{ADH5}) \cdot K_{\text{etoh}}(\text{ADH5})} + \frac{[\text{acetaldehyde}] \cdot [\text{ethanol}] \cdot [\text{NAD}]}{K_{\text{inadh}}(\text{ADH5}) \cdot K_{\text{acald}}(\text{ADH5}) \cdot K_{\text{etoh}}(\text{ADH5})}$$

$$v_{\text{AK}} = k_{\text{(AK)}} \cdot \left( [\text{ADP}] \cdot [\text{ADP}] - \frac{[\text{AMP}] \cdot [\text{ATP}]}{K_{\text{eq}}(\text{AK})} \right)$$

$$v_{\text{ATPase}} = \frac{V_{\text{max}}(\text{ATPase}) \cdot [\text{ATP}]}{K_{\text{atp}}(\text{ATPase}) + [\text{ATP}]}$$

$$v_{\text{CDC19}} = \frac{[\text{CDC19}] \cdot k_{\text{cat}}(\text{CDC19}) \cdot \left( \frac{[\text{phosphoenolpyruvate}] \cdot [\text{ADP}] - \frac{[\text{pyruvate}] \cdot [\text{ATP}]}{K_{\text{eq\_PYK}}}}{K_{\text{pep}}(\text{CDC19}) \cdot K_{\text{adp}}(\text{CDC19})} \right)}{\left( 1 + \frac{[\text{phosphoenolpyruvate}]}{K_{\text{pep}}(\text{CDC19})} + \frac{[\text{pyruvate}]}{K_{\text{pyr}}(\text{CDC19})} + L0(\text{CDC19}) \cdot \frac{K_{\text{infp}}(\text{CDC19})}{K_{\text{fructose 1,6-bisphosphate}} + 1} + 1 \right) \cdot \left( 1 + \frac{[\text{ADP}]}{K_{\text{adp}}(\text{CDC19})} + \frac{[\text{ATP}]}{K_{\text{atp}}(\text{CDC19})} \right)}$$

$$v_{\text{ENO1}} = \frac{[\text{ENO1}] \cdot k_{\text{cat}}(\text{ENO1}) \cdot \left( \frac{[2\text{-phosphoglycerate}]}{K_{\text{p2g}}(\text{ENO1})} - \frac{[\text{phosphoenolpyruvate}]}{K_{\text{pep}}(\text{ENO1}) \cdot K_{\text{eq\_ENO}}} \right)}{1 + \frac{[2\text{-phosphoglycerate}]}{K_{\text{p2g}}(\text{ENO1})} + \frac{[\text{phosphoenolpyruvate}]}{K_{\text{pep}}(\text{ENO1})}}$$

$$v_{\text{ENO2}} = \frac{[\text{ENO2}] \cdot k_{\text{cat}}(\text{ENO2}) \cdot \left( \frac{[2\text{-phosphoglycerate}]}{K_{\text{p2g}}(\text{ENO2})} - \frac{[\text{phosphoenolpyruvate}]}{K_{\text{pep}}(\text{ENO2}) \cdot K_{\text{eq\_ENO}}} \right)}{1 + \frac{[2\text{-phosphoglycerate}]}{K_{\text{p2g}}(\text{ENO2})} + \frac{[\text{phosphoenolpyruvate}]}{K_{\text{pep}}(\text{ENO2})}}$$

$$v_{\text{FBA}} = \frac{[\text{FBA1}] \cdot k_{\text{cat}}(\text{FBA}) \cdot \left( \frac{[\text{fructose 1,6-bisphosphate}] \cdot [\text{dihydroxyacetone phosphate}] \cdot [\text{glyceraldehyde 3-phosphate}]}{K_{\text{f16bp}}(\text{FBA}) \cdot K_{\text{dha}}(\text{FBA}) \cdot K_{\text{g3p}}(\text{FBA})} - \frac{[\text{dihydroxyacetone phosphate}] \cdot [\text{glyceraldehyde 3-phosphate}]}{K_{\text{f16bp}}(\text{FBA}) \cdot K_{\text{eq\_FBA}}} \right)}{1 + \frac{[\text{fructose 1,6-bisphosphate}]}{K_{\text{f16bp}}(\text{FBA})} + \frac{[\text{dihydroxyacetone phosphate}]}{K_{\text{dha}}(\text{FBA})} + \frac{[\text{glyceraldehyde 3-phosphate}]}{K_{\text{g3p}}(\text{FBA})} + \frac{[\text{fructose 1,6-bisphosphate}] \cdot [\text{glyceraldehyde 3-phosphate}]}{K_{\text{f16bp}}(\text{FBA}) \cdot K_{\text{g3p}}(\text{FBA})} + \frac{[\text{dihydroxyacetone phosphate}] \cdot [\text{glyceraldehyde 3-phosphate}]}{K_{\text{dha}}(\text{FBA}) \cdot K_{\text{g3p}}(\text{FBA})}$$

$$v_{\text{GLK1}} = \frac{[\text{GLK1}] \cdot k_{\text{cat}}(\text{GLK1}) \cdot \left( \frac{[\text{glucosecell}] \cdot [\text{ATP}]}{K_{\text{glc}}(\text{GLK1}) \cdot K_{\text{atp}}(\text{GLK1})} - \frac{[\text{glucose 6-phosphate}] \cdot [\text{ADP}]}{K_{\text{glc}}(\text{GLK1}) \cdot K_{\text{atp}}(\text{GLK1}) \cdot K_{\text{eq\_HXK}}} \right)}{\left( 1 + \frac{[\text{glucosecell}]}{K_{\text{glc}}(\text{GLK1})} + \frac{[\text{glucose 6-phosphate}]}{K_{\text{g6p}}(\text{GLK1})} \right) \cdot \left( 1 + \frac{[\text{ATP}]}{K_{\text{atp}}(\text{GLK1})} + \frac{[\text{ADP}]}{K_{\text{adp}}(\text{GLK1})} \right)}$$

$$v_{\text{Glycerol3P}} = \frac{V_{\text{max}}(\text{Glycerol3P}) \cdot [\text{glycerol 3-phosphate}]}{1 + \frac{[\text{glycerol 3-phosphate}]}{K_{\text{g3p}}(\text{Glycerol3P})}}$$

$$v_{\text{Glycerol3PDH}} = \frac{V_{\text{max}}(\text{Glycerol3PDH}) \cdot \left( [\text{dihydroxyacetone phosphate}] \cdot [\text{NADH}] - \frac{[\text{glycerol 3-phosphate}] \cdot [\text{NAD}]}{K_{\text{eq}}(\text{Glycerol3PDH})} \right)}{\left( 1 + \frac{[\text{fructose 1,6-bisphosphate}]}{K_{\text{f16bp}}(\text{Glycerol3PDH})} + \frac{[\text{ATP}]}{K_{\text{atp}}(\text{Glycerol3PDH})} + \frac{[\text{ADP}]}{K_{\text{adp}}(\text{Glycerol3PDH})} \right) \cdot \left( 1 + \frac{[\text{dihydroxyacetone phosphate}]}{K_{\text{dha}}(\text{Glycerol3PDH})} + \frac{[\text{glycerol 3-phosphate}]}{K_{\text{g3p}}(\text{Glycerol3PDH})} \right) \cdot \left( 1 + \frac{[\text{NADH}]}{K_{\text{inadh}}(\text{Glycerol3PDH})} + \frac{[\text{NAD}]}{K_{\text{inad}}(\text{Glycerol3PDH})} \right)}$$

$$v_{\text{GPM1}} = \frac{[\text{GPM1}] \cdot k_{\text{cat}}(\text{GPM1}) \cdot \left( \frac{[3\text{-phosphoglycerate}]}{K_{\text{p3g}}(\text{GPM1})} - \frac{[2\text{-phosphoglycerate}]}{K_{\text{p2g}}(\text{GPM1}) \cdot K_{\text{eq}}(\text{GPM1})} \right)}{1 + \frac{[3\text{-phosphoglycerate}]}{K_{\text{p3g}}(\text{GPM1})} + \frac{[2\text{-phosphoglycerate}]}{K_{\text{p2g}}(\text{GPM1})}}$$

$$v_{\text{HXK1}} = \frac{[\text{HXK1}] \cdot k_{\text{cat}}(\text{HXK1}) \cdot \left( \frac{[\text{glucosecell}] \cdot [\text{ATP}]}{K_{\text{glc}}(\text{HXK1}) \cdot K_{\text{atp}}(\text{HXK1})} - \frac{[\text{glucose 6-phosphate}] \cdot [\text{ADP}]}{K_{\text{glc}}(\text{HXK1}) \cdot K_{\text{atp}}(\text{HXK1}) \cdot K_{\text{eq\_HXK}}} \right)}{\left( 1 + \frac{[\text{glucosecell}]}{K_{\text{glc}}(\text{HXK1})} + \frac{[\text{glucose 6-phosphate}]}{K_{\text{g6p}}(\text{HXK1})} + \frac{[\text{trehalose 6-phosphate}]}{K_{\text{it6p}}(\text{HXK1})} \right) \cdot \left( 1 + \frac{[\text{ATP}]}{K_{\text{atp}}(\text{HXK1})} + \frac{[\text{ADP}]}{K_{\text{adp}}(\text{HXK1})} \right)}$$

$$v_{\text{HXK2}} = \frac{[\text{HXK2}] \cdot k_{\text{cat}}(\text{HXK2}) \cdot \left( \frac{[\text{glucosecell}] \cdot [\text{ATP}]}{K_{\text{glc}}(\text{HXK2}) \cdot K_{\text{atp}}(\text{HXK2})} - \frac{[\text{glucose 6-phosphate}] \cdot [\text{ADP}]}{K_{\text{glc}}(\text{HXK2}) \cdot K_{\text{atp}}(\text{HXK2}) \cdot K_{\text{eq\_HXK}}} \right)}{\left( 1 + \frac{[\text{glucosecell}]}{K_{\text{glc}}(\text{HXK2})} + \frac{[\text{glucose 6-phosphate}]}{K_{\text{g6p}}(\text{HXK2})} + \frac{[\text{trehalose 6-phosphate}]}{K_{\text{it6p}}(\text{HXK2})} \right) \cdot \left( 1 + \frac{[\text{ATP}]}{K_{\text{atp}}(\text{HXK2})} + \frac{[\text{ADP}]}{K_{\text{adp}}(\text{HXK2})} \right)}$$

$$v_{\text{HXT}} = \frac{V_{\text{max}}(\text{HXT}) \cdot ([\text{glucoseextracellular}] - [\text{glucosecell}])}{K_{\text{glc}}(\text{HXT}) + \frac{K_{\text{i}}(\text{HXT}) \cdot [\text{glucoseextracellular}]}{K_{\text{glc}}(\text{HXT})} + \frac{[\text{glucoseextracellular}]}{K_{\text{glc}}(\text{HXT})} + \frac{[\text{glucosecell}]}{K_{\text{glc}}(\text{HXT})}$$

$$v_{\text{PDC1}} = \frac{[\text{PDC1}] \cdot k_{\text{cat}}(\text{PDC1}) \cdot \frac{[\text{pyruvate}]}{K_{\text{pyr}}(\text{PDC1})}}{1 + \frac{[\text{pyruvate}]}{K_{\text{pyr}}(\text{PDC1})}}$$

$$v_{\text{PDC5}} = \frac{[\text{PDC5}] \cdot k_{\text{cat}}(\text{PDC5}) \cdot \frac{[\text{pyruvate}]}{K_{\text{pyr}}(\text{PDC5})}}{1 + \frac{[\text{pyruvate}]}{K_{\text{pyr}}(\text{PDC5})}}$$

$$v_{\text{PDC6}} = \frac{[\text{PDC6}] \cdot k_{\text{cat}}(\text{PDC6}) \cdot \frac{[\text{pyruvate}]}{K_{\text{pyr}}(\text{PDC6})}}{1 + \frac{[\text{pyruvate}]}{K_{\text{pyr}}(\text{PDC6})}}$$

$$v_{\text{PFK}} = \min([\text{PFK1}], [\text{PFK2}]) \cdot k_{\text{cat}}(\text{PFK}) \cdot \frac{g_{\text{R}}(\text{PFK}) \cdot \frac{[\text{fructose 6-phosphate}]}{K_{\text{f6p}}(\text{PFK})} \cdot \frac{[\text{ATP}]}{K_{\text{atp}}(\text{PFK})} \cdot \left( 1 - \frac{[\text{fructose 1,6-bisphosphate}] \cdot [\text{ADP}]}{[\text{fructose 6-phosphate}] \cdot [\text{ATP}]} \right)}{\left( 1 + \frac{[\text{fructose 6-phosphate}]}{K_{\text{f6p}}(\text{PFK})} + \frac{[\text{ATP}]}{K_{\text{atp}}(\text{PFK})} + \frac{g_{\text{R}}(\text{PFK}) \cdot [\text{fructose 6-phosphate}] \cdot [\text{ATP}]}{K_{\text{f6p}}(\text{PFK}) \cdot K_{\text{atp}}(\text{PFK})} + \frac{[\text{fructose 1,6-bisphosphate}]}{K_{\text{f16bp}}(\text{PFK})} + \frac{[\text{ADP}]}{K_{\text{adp}}(\text{PFK})} + \frac{g_{\text{R}}(\text{PFK}) \cdot [\text{fructose 1,6-bisphosphate}] \cdot [\text{ADP}]}{K_{\text{f16bp}}(\text{PFK}) \cdot K_{\text{adp}}(\text{PFK})} \right)} \cdot \left( 1 + \frac{[\text{fructose 6-phosphate}]}{K_{\text{f6p}}(\text{PFK})} + \frac{[\text{ATP}]}{K_{\text{atp}}(\text{PFK})} + \frac{g_{\text{R}}(\text{PFK}) \cdot \text{mathrm}[\text{fructose 1,6-bisphosphate}] \cdot [\text{ADP}]^2}{K_{\text{f6p}}(\text{PFK}) \cdot K_{\text{f16bp}}(\text{PFK}) \cdot K_{\text{adp}}(\text{PFK})} + L0(\text{PFK}) \cdot \left( 1 + \frac{[\text{ATP}]}{K_{\text{infp}}(\text{PFK})} \right)^2 \cdot \left( 1 + \frac{[\text{AMP}]}{K_{\text{amp}}(\text{PFK})} \right)^2 \cdot \left( 1 + \frac{C_{\text{f26}}(\text{PFK}) \cdot [\text{fructose 2,6-bisphosphate}] + C_{\text{f16}}(\text{PFK}) \cdot [\text{fructose 1,6-bisphosphate}]}{K_{\text{f26}}(\text{PFK}) + K_{\text{f16}}(\text{PFK})} \right)^2 \cdot \left( 1 + \frac{C_{\text{atp}}(\text{PFK}) \cdot [\text{ATP}]}{K_{\text{atp}}(\text{PFK})} \right)^2$$

$$v_{\text{PGI}} = \frac{[\text{PGI1}] \cdot k_{\text{cat}}(\text{PGI}) \cdot \left( \frac{[\text{glucose 6-phosphate}]}{K_{\text{g6p}}(\text{PGI})} - \frac{[\text{fructose 6-phosphate}]}{K_{\text{g6p}}(\text{PGI}) \cdot K_{\text{eq}}(\text{PGI})} \right)}{1 + \frac{[\text{glucose 6-phosphate}]}{K_{\text{g6p}}(\text{PGI})} + \frac{[\text{fructose 6-phosphate}]}{K_{\text{f6p}}(\text{PGI})}}$$

$$v_{\text{PGK1}} = \frac{[\text{PGK1}] \cdot k_{\text{cat}}(\text{PGK1}) \cdot \left( \frac{[\text{ADP}]}{K_{\text{adp}}(\text{PGK1})} \right)^{n_{\text{HAdp}}(\text{PGK1}) - 1} \cdot \left( \frac{[1,3\text{-bisphosphoglycerate}] \cdot [\text{ADP}]}{K_{\text{bpg}}(\text{PGK1}) \cdot K_{\text{adp}}(\text{PGK1})} - \frac{[3\text{-phosphoglycerate}] \cdot [\text{ATP}]}{K_{\text{bpg}}(\text{PGK1}) \cdot K_{\text{adp}}(\text{PGK1}) \cdot K_{\text{eq}}(\text{PGK1})} \right)}{\left( 1 + \frac{[1,3\text{-bisphosphoglycerate}]}{K_{\text{bpg}}(\text{PGK1})} + \frac{[3\text{-phosphoglycerate}]}{K_{\text{p3g}}(\text{PGK1})} \right) \cdot \left( 1 + \left( \frac{[\text{ADP}]}{K_{\text{adp}}(\text{PGK1})} \right)^{n_{\text{HAdp}}(\text{PGK1})} + \frac{[\text{ATP}]}{K_{\text{atp}}(\text{PGK1})} \right)}$$

$$v_{\text{PGM}} = \frac{V_{\text{max}}(\text{PGM}) \cdot \left( \frac{[\text{glucose 6-phosphate}]}{K_{\text{g6p}}(\text{PGM})} - \frac{[\text{glucose 1-phosphate}]}{K_{\text{g6p}}(\text{PGM}) \cdot K_{\text{eq}}(\text{PGM})} \right)}{1 + \frac{[\text{glucose 6-phosphate}]}{K_{\text{g6p}}(\text{PGM})} + \frac{[\text{glucose 1-phosphate}]}{K_{\text{g1p}}(\text{PGM})}}$$

$$v_{\text{PYK2}} = \frac{[\text{PYK2}] \cdot k_{\text{cat}}(\text{PYK2}) \cdot \left( \frac{[\text{phosphoenolpyruvate}] \cdot [\text{ADP}] - \frac{[\text{pyruvate}] \cdot [\text{ATP}]}{K_{\text{eq\_PYK}}}}{K_{\text{pep}}(\text{PYK2}) \cdot K_{\text{adp}}(\text{PYK2})} \right)}{\left( 1 + \frac{[\text{phosphoenolpyruvate}]}{K_{\text{pep}}(\text{PYK2})} + \frac{[\text{pyruvate}]}{K_{\text{pyr}}(\text{PYK2})} + L0(\text{PYK2}) \cdot \frac{K_{\text{infp}}(\text{PYK2})}{K_{\text{fructose 1,6-bisphosphate}} + 1} + 1 \right) \cdot \left( 1 + \frac{[\text{ADP}]}{K_{\text{adp}}(\text{PYK2})} + \frac{[\text{ATP}]}{K_{\text{atp}}(\text{PYK2})} \right)}$$

$$v_{\text{succinate branch}} = k_{\text{(succinate branch)}} \cdot [\text{pyruvate}] \cdot [\text{NAD}]$$

$$\begin{aligned}
v_{\text{T6P synthase}} &= \frac{V_{\text{max}}(\text{T6P synthase}) \cdot [\text{glucose 6-phosphate}] \cdot [\text{UDP glucose}]}{\left(1 + \frac{[\text{glucose 6-phosphate}]}{K_{\text{g6p}}(\text{T6P synthase})}\right) \cdot \left(1 + \frac{[\text{UDP glucose}]}{K_{\text{udg}}(\text{T6P synthase})}\right)} \\
v_{\text{TDH1}} &= \frac{[\text{TDH1}] \cdot k_{\text{cat}}(\text{TDH1}) \cdot \left(\frac{[\text{glyceraldehyde 3-phosphate}] \cdot [\text{NAD}]}{K_{\text{g3p}}(\text{TDH1}) \cdot K_{\text{nad}}(\text{TDH1})} - \frac{[1,3\text{-bisphosphoglycerate}] \cdot [\text{NADH}]}{K_{\text{g3p}}(\text{TDH1}) \cdot K_{\text{nad}}(\text{TDH1}) \cdot K_{\text{eq-TDH}}}\right)}{\left(1 + \frac{[\text{glyceraldehyde 3-phosphate}]}{K_{\text{g3p}}(\text{TDH1})} + \frac{[1,3\text{-bisphosphoglycerate}]}{K_{\text{bpg}}(\text{TDH1})}\right) \cdot \left(1 + \frac{[\text{NAD}]}{K_{\text{nad}}(\text{TDH1})} + \frac{[\text{NADH}]}{K_{\text{nadH}}(\text{TDH1})}\right)} \\
v_{\text{TDH2}} &= \frac{[\text{TDH2}] \cdot k_{\text{cat}}(\text{TDH2}) \cdot \left(\frac{[\text{glyceraldehyde 3-phosphate}] \cdot [\text{NAD}]}{K_{\text{g3p}}(\text{TDH2}) \cdot K_{\text{nad}}(\text{TDH2})} - \frac{[1,3\text{-bisphosphoglycerate}] \cdot [\text{NADH}]}{K_{\text{g3p}}(\text{TDH2}) \cdot K_{\text{nad}}(\text{TDH2}) \cdot K_{\text{eq-TDH}}}\right)}{\left(1 + \frac{[\text{glyceraldehyde 3-phosphate}]}{K_{\text{g3p}}(\text{TDH2})} + \frac{[1,3\text{-bisphosphoglycerate}]}{K_{\text{bpg}}(\text{TDH2})}\right) \cdot \left(1 + \frac{[\text{NAD}]}{K_{\text{nad}}(\text{TDH2})} + \frac{[\text{NADH}]}{K_{\text{nadH}}(\text{TDH2})}\right)} \\
v_{\text{TDH3}} &= \frac{[\text{TDH3}] \cdot k_{\text{cat}}(\text{TDH3}) \cdot \left(\frac{[\text{glyceraldehyde 3-phosphate}] \cdot [\text{NAD}]}{K_{\text{g3p}}(\text{TDH3}) \cdot K_{\text{nad}}(\text{TDH3})} - \frac{[1,3\text{-bisphosphoglycerate}] \cdot [\text{NADH}]}{K_{\text{g3p}}(\text{TDH3}) \cdot K_{\text{nad}}(\text{TDH3}) \cdot K_{\text{eq-TDH}}}\right)}{\left(1 + \frac{[\text{glyceraldehyde 3-phosphate}]}{K_{\text{g3p}}(\text{TDH3})} + \frac{[1,3\text{-bisphosphoglycerate}]}{K_{\text{bpg}}(\text{TDH3})}\right) \cdot \left(1 + \frac{[\text{NAD}]}{K_{\text{nad}}(\text{TDH3})} + \frac{[\text{NADH}]}{K_{\text{nadH}}(\text{TDH3})}\right)} \\
v_{\text{TPI}} &= \frac{\frac{[\text{TPI1}] \cdot k_{\text{cat}}(\text{TPI})}{K_{\text{ghap}}(\text{TPI})} \cdot \left([\text{dihydroxyacetone phosphate}] - \frac{[\text{glyceraldehyde 3-phosphate}]}{K_{\text{g3p}}(\text{TPI})}\right)}{1 + \frac{[\text{dihydroxyacetone phosphate}]}{K_{\text{ghap}}(\text{TPI})} + \frac{[\text{glyceraldehyde 3-phosphate}]}{K_{\text{g3p}}(\text{TPI})} \cdot \left(1 + \left(\frac{[\text{glyceraldehyde 3-phosphate}]}{K_{\text{g3p}}(\text{TPI})}\right)^4\right)} \\
v_{\text{UDP-glucose phosphorylase}} &= \frac{V_{\text{max}}(\text{UDP-glucose phosphorylase}) \cdot [\text{UTP}] \cdot [\text{glucose 1-phosphate}]}{K_{\text{utp}}(\text{UDP-glucose phosphorylase}) + \frac{[\text{UTP}] \cdot [\text{glucose 1-phosphate}]}{K_{\text{g1p}}(\text{UDP-glucose phosphorylase})} + \frac{K_{\text{utp}}(\text{UDP-glucose phosphorylase}) \cdot [\text{UDP glucose}]}{K_{\text{udg}}(\text{UDP-glucose phosphorylase})} + \frac{[\text{glucose 1-phosphate}] \cdot [\text{UDP glucose}]}{K_{\text{g1p}}(\text{UDP-glucose phosphorylase}) \cdot K_{\text{udg}}(\text{UDP-glucose phosphorylase})}} \\
v_{\text{UDP to UTP pseudoreaction}} &= k_{\text{(UDP to UTP pseudoreaction)}} \cdot [\text{UDP}] \cdot [\text{ATP}]
\end{aligned}$$

## Differential equations

$$\begin{aligned}
\frac{d([\text{ADP}])}{dt} &= +v_{\text{UDP to UTP pseudoreaction}} - v_{\text{PYK2}} - v_{\text{CDC19}} - v_{\text{PGK1}} + v_{\text{PFK}} + v_{\text{HXK2}} + v_{\text{HXK1}} + v_{\text{GLK1}} + v_{\text{ATPase}} - 2 \cdot v_{\text{AK}} \\
\frac{d([\text{ATP}])}{dt} &= -v_{\text{UDP to UTP pseudoreaction}} + v_{\text{PYK2}} + v_{\text{CDC19}} + v_{\text{PGK1}} - v_{\text{PFK}} - v_{\text{HXK2}} - v_{\text{HXK1}} - v_{\text{GLK1}} - v_{\text{ATPase}} + v_{\text{AK}} \\
\frac{d([\text{acetaldehyde}])}{dt} &= +v_{\text{PDC6}} + v_{\text{PDC5}} + v_{\text{PDC1}} - v_{\text{acetate branch}} - v_{\text{ADH5}} - v_{\text{ADH1}} \\
\frac{d([1,3\text{-bisphosphoglycerate}])}{dt} &= +v_{\text{TDH1}} - v_{\text{PGK1}} + v_{\text{TDH2}} + v_{\text{TDH3}} \\
\frac{d([\text{dihydroxyacetone phosphate}])}{dt} &= +v_{\text{FBA}} - v_{\text{TPI}} - v_{\text{Glycerol3PDH}} \\
\frac{d([\text{fructose 1,6-bisphosphate}])}{dt} &= +v_{\text{PFK}} - v_{\text{FBA}} \\
\frac{d([\text{fructose 6-phosphate}])}{dt} &= +v_{\text{PGI}} - v_{\text{PFK}} \\
\frac{d([\text{glucose 1-phosphate}])}{dt} &= +v_{\text{PGM}} - v_{\text{UDP-glucose phosphorylase}} \\
\frac{d([\text{glycerol 3-phosphate}])}{dt} &= -v_{\text{Glycerol3P}} + v_{\text{Glycerol3PDH}} \\
\frac{d([\text{glucose 6-phosphate}])}{dt} &= -v_{\text{PGM}} - v_{\text{PGI}} + v_{\text{HXK2}} + v_{\text{HXK1}} + v_{\text{GLK1}} - v_{\text{T6Psynth}} \\
\frac{d([\text{glyceraldehyde 3-phosphate}])}{dt} &= -v_{\text{TDH1}} + v_{\text{FBA}} + v_{\text{TPI}} - v_{\text{TDH3}} - v_{\text{TDH2}} \\
\frac{d([\text{glucose\_cell}])}{dt} &= +v_{\text{HXT}} - v_{\text{HXK2}} - v_{\text{HXK1}} - v_{\text{GLK1}} \\
\frac{d([\text{NAD}])}{dt} &= -v_{\text{TDH1}} - 3 \cdot v_{\text{succinate branch}} + v_{\text{Glycerol3PDH}} - v_{\text{acetate branch}} + v_{\text{ADH5}} + v_{\text{ADH1}} - v_{\text{TDH3}} - v_{\text{TDH2}} \\
\frac{d([2\text{-phosphoglycerate}])}{dt} &= +v_{\text{GPM1}} - v_{\text{ENO1}} - v_{\text{ENO2}} \\
\frac{d([3\text{-phosphoglycerate}])}{dt} &= +v_{\text{PGK1}} - v_{\text{GPM1}} \\
\frac{d([\text{phosphoenolpyruvate}])}{dt} &= -v_{\text{PYK2}} - v_{\text{CDC19}} + v_{\text{ENO1}} + v_{\text{ENO2}} \\
\frac{d([\text{pyruvate}])}{dt} &= +v_{\text{PYK2}} + v_{\text{CDC19}} - v_{\text{PDC6}} - v_{\text{PDC5}} - v_{\text{PDC1}} - v_{\text{succinate branch}} \\
\frac{d([\text{trehalose 6-phosphate}])}{dt} &= +v_{\text{T6Psynth}} - v_{\text{T6P phosphatase}} \\
\frac{d([\text{UDP}])}{dt} &= -v_{\text{UDP to UTP pseudoreaction}} + v_{\text{T6Psynth}} \\
\frac{d([\text{UTP}])}{dt} &= +v_{\text{UDP to UTP pseudoreaction}} - v_{\text{UDP-glucose phosphorylase}}
\end{aligned}$$

## Mass conservation

$$\begin{aligned}
[\text{AMP}] &= \text{sum\_AXP} - [\text{ATP}] - [\text{ADP}] \\
[\text{NADH}] &= \text{sum\_NAD} - [\text{NAD}] \\
[\text{UDP-glucose}] &= \text{sum\_UXP} - [\text{UTP}] - [\text{UDP}] \\
\text{energy\_charge} &= \frac{[\text{ATP}] + \frac{[\text{ADP}]}{2}}{\text{sum\_AXP}}
\end{aligned}$$
